# Supplementary material for: Vibronic coherence contributes to photocurrent generation in organic semiconductor heterojunction diodes
Source: Springer Nature journal article supplement (doi:10.1038/s41467-020-14476-w), 2020-01-30
Supplement: 41467_2020_14476_MOESM3_ESM.pdf [file 41467_2020_14476_MOESM3_ESM.pdf]

## **Description of Additional Supplementary Files**

File Name: Supplementary Movie 1

Description: in-plane breathing of the benzo[1,2-b;4,5-b']dithiophene donor unit

File Name: Supplementary Movie 2

Description: out-of-plane vibration of the 3-fluorothieno[3,4-b]thiophene donor unit

File Name: Supplementary Movie 3:

Description: out-of-plane vibration of the 3-fluorothieno[3,4-b]thiophene donor unit
